# Supplementary material for: Gut Microbial Protein Expression in Response to Dietary Patterns in a Controlled Feeding Study: A Metaproteomic Approach
Source: MDPI journal article supplement (doi:10.3390/microorganisms8030379), 2020-03-07
Supplement: s1 [file s1]

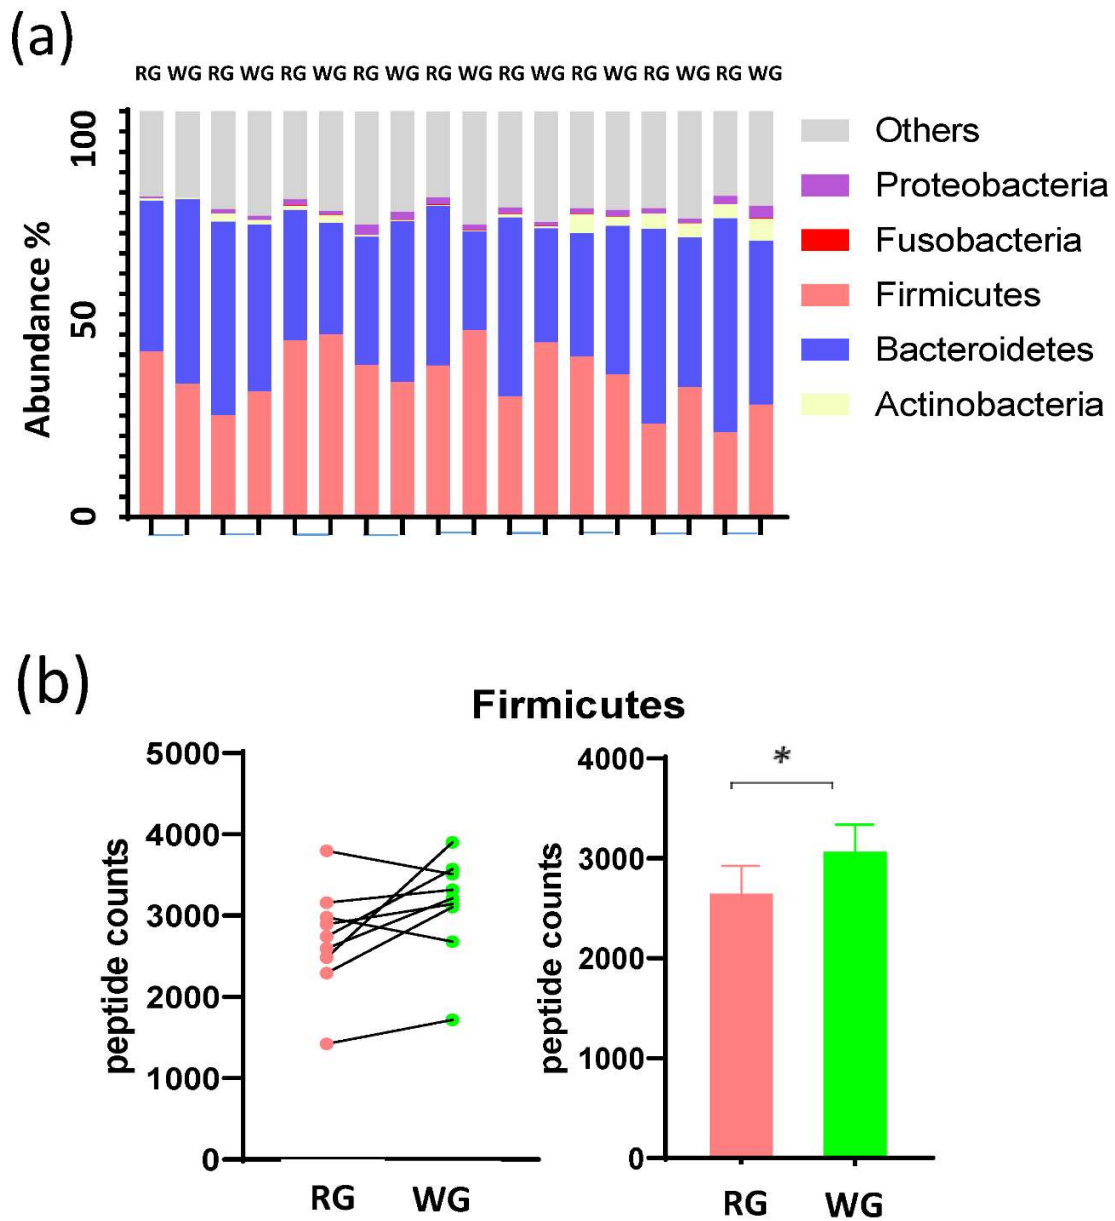

Figure S1. Composition and relative abundance of (a) bacterial phyla and (b) changes in Firmicutes in the metaproteomic data by diet (RG and WG diets).

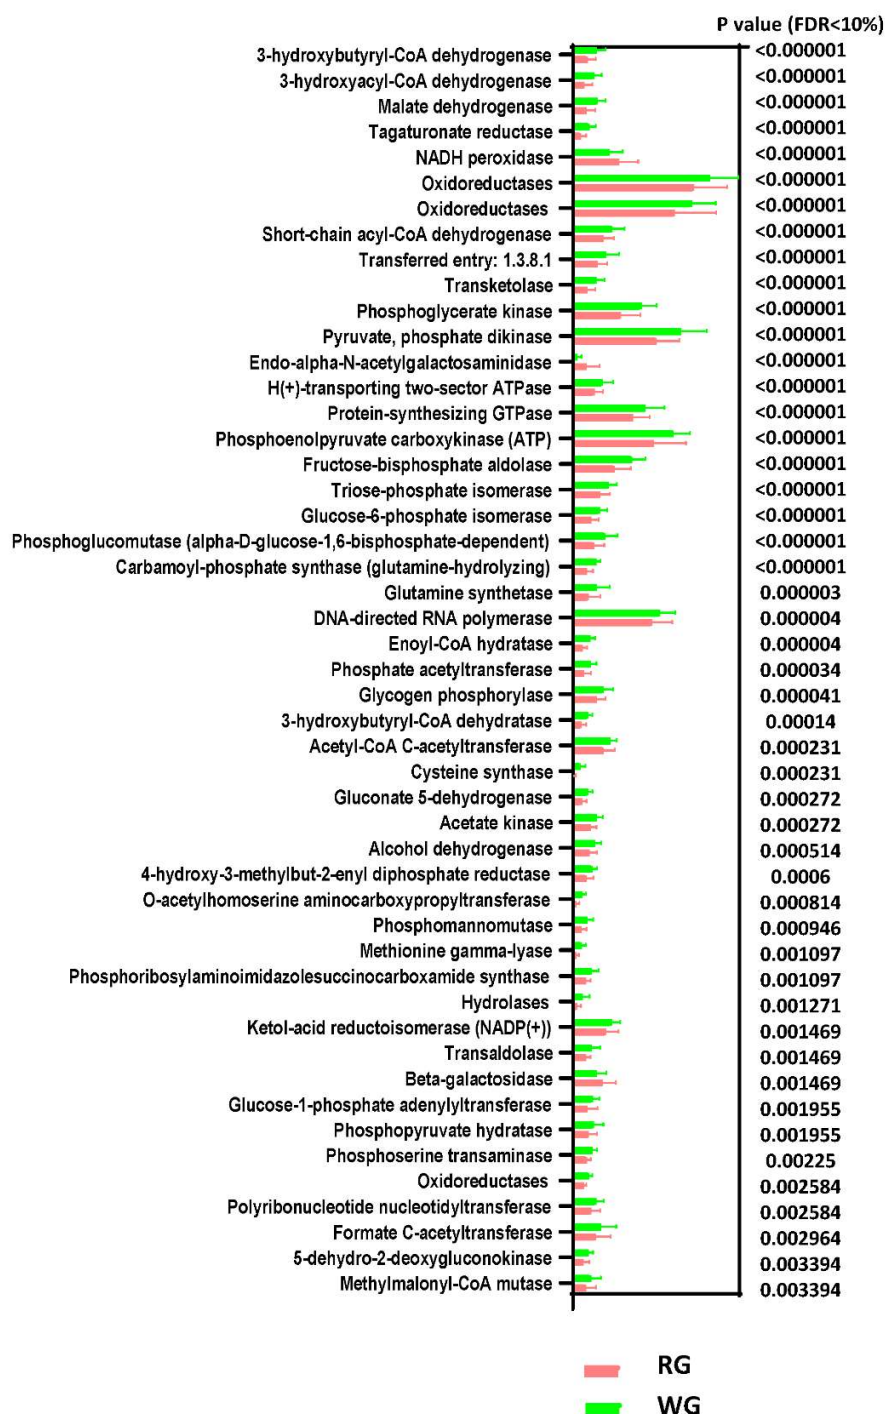

**Figure S2.** Significant differences in GO biological processes by diet. Enzymes significantly different between the two diet treatments
